# Supplementary material for: Naïve CD4+ T Cell Lymphopenia and Apoptosis in Chronic Hepatitis C Virus Infection Is Driven by the CD31+ Subset and Is Partially Normalized in Direct-Acting Antiviral Treated Persons
Source: PubMed Central journal article supplement (PMC8075159; doi:10.3389/fimmu.2021.641230), 2021-04-12
Supplement: Table_1.pdf [file Table_1.pdf]

**Supplemental Table 1: Clinical characteristics of HCV DAA-treated longitudinal cohort**

| <b>Parameters</b>                       | <b>HCV Infected at DAA Therapy Start<br/>n=16</b> |
|-----------------------------------------|---------------------------------------------------|
| <b>Age, years<sup>1</sup></b>           | 64 (58-67)                                        |
| <b>Gender; No. (%)</b>                  |                                                   |
| <b>Male</b>                             | 15 (94%)                                          |
| <b>Female</b>                           | 1 (6%)                                            |
| <b>Race/ethnicity; No. (%)</b>          |                                                   |
| <b>Black</b>                            | 9 (44%)                                           |
| <b>White</b>                            | 7 (56%)                                           |
| <b>Other</b>                            | 0 (0%)                                            |
| <b>Albumin level (g/dL)</b>             | 3.6 (3.5;3.9)                                     |
| <b>ALT level (U/L)</b>                  | 45 (35; 61)                                       |
| <b>AST level (U/L)</b>                  | 31 (30; 45)                                       |
| <b>Platelets (x10<sup>9</sup>/L)</b>    | 225 (186; 279)                                    |
| <b>APRI; No. (%)</b>                    |                                                   |
| <b>&lt;0.4</b>                          | 6 (55%)                                           |
| <b>0.4-1.5</b>                          | 4 (36%)                                           |
| <b>&gt;1.5</b>                          | 1 (9%)                                            |
| <b>Fibrosis 4 index</b>                 | 1.7 (1.3; 2.4)                                    |
| <b>Transient Elastography score</b>     | 5 (4.4,6.0)                                       |
| <b>Transient Elastography score (%)</b> |                                                   |
| <b>&lt;9.5</b>                          | 11 (100%)                                         |
| <b>9.5-12.5</b>                         | 0 (0%)                                            |
| <b>&gt;12.5</b>                         | 0 (0%)                                            |
| <b>HCV Genotype; No. (%)</b>            |                                                   |
| <b>1a</b>                               | 11 (69%)                                          |
| <b>1b</b>                               | 3 (19%)                                           |

2

2 (12%)

**Plasma HCV RNA level (IU/L)**

3,014,233 (311,195; 4,767,721)

---

Median (25<sup>th</sup>;75<sup>th</sup> percentiles) shown unless otherwise indicated
