# Supplementary material for: Naïve CD4+ T Cell Lymphopenia and Apoptosis in Chronic Hepatitis C Virus Infection Is Driven by the CD31+ Subset and Is Partially Normalized in Direct-Acting Antiviral Treated Persons
Source: PubMed Central journal article supplement (PMC8075159; doi:10.3389/fimmu.2021.641230), 2021-04-12
Supplement: Table_2.pdf [file Table_2.pdf]

**Supplemental Table 2: Soluble markers of systemic immune activation markers of cross-sectional cohorts**

| <b>Sample size**</b>          | <b>HCV Infected<br/>n=exact sample<br/>size</b> | <b>HCV Treated<br/>n=</b> | <b>P value</b> |
|-------------------------------|-------------------------------------------------|---------------------------|----------------|
| <b>IP-10 (pg/mL)</b>          | 56.2 (36.8; 104.1)                              | 25.8 (17.4; 34.5)         | 0.002*         |
| <b>Soluble CD163 (ng/mL)</b>  | 26.7(18.2; 40.0)                                | 19.0 (14.9; 25.5)         | 0.09           |
| <b>Autotaxin (ng/mL)</b>      | 15.0 (0.02; 23.0)                               | 17.4 (13.8; 22.6)         | 0.50           |
| <b>Soluble CD14 (ng/mL)</b>   | 4996 (4314; 7242)                               | 4999 (3662; 6102)         | 0.76           |
| <b>Soluble TNFRII (pg/mL)</b> | 70.0 (51.5; 80.2)                               | 75.8 (49.9; 96.0)         | 0.83           |
| <b>IL-7 (pg/mL)</b>           | 1.0 (10.0; 23.0)                                | 1.2 (0.8; 1.9)            | 0.48           |
| <b>IL-6 (pg/mL)</b>           | 3.4 (0.5;1.6)                                   | 4.2 (3.4; 5.6)            | 0.27           |

Median (25<sup>th</sup>; 75<sup>th</sup> percentiles)

\*Statistically significant (P value <0.05) using Mann Whitney test for unpaired comparison

\*\*Samples not available for full cohort
